# Supplementary material
Source: ML conference proceedings conference paper supplement (https://aclanthology.org/2026.semeval-1.296)
Supplement: SupplementaryMaterial [file diagram.pdf › diagram.pdf]

*Anchor story (A)*

After many years away sailor Hannes Wedderkamp returns to his home city...

*Candidate story (C)*

The 50-year-old guy Man who was a resident of Mindelo on the island of Vicente as a pubkeeper...

**Jamba-1.5-Mini**  
SSM Layers (Frozen)

MLP

$M_{macro}$

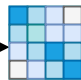

Upsample &  
Sigmoid

$M_{micro}$

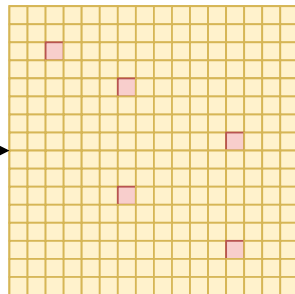

$M_{filtered}$

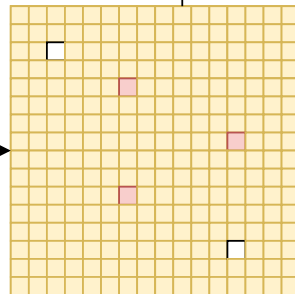

The Structural Gate ( $G$ )

*Similarity  
Score*

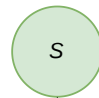

Max Pool →  
Mean Pool
